# Supplementary material for: Reasons for Tooth Extractions in Japan: The Second Nationwide Survey
Source: PubMed Central journal article supplement — Int Dent J. 2021 Jun 28;72(3):366–72. doi: 10.1016/j.identj.2021.05.008 (PMC9275201; doi:10.1016/j.identj.2021.05.008), 2021-06-28
Supplement: mmc1.pdf [file mmc1.pdf]

Appendix A Total number of members of Japan Dental Association and recovery rate by prefecture.

| Prefecture   | Total number of members of Japan Dental Association (2018) | Number of sending | Number of recovery | Recovery rate (%) |
|--------------|------------------------------------------------------------|-------------------|--------------------|-------------------|
| Hokkaido     | 3,064                                                      | 280               | 97                 | 34.8              |
| Aomori       | 568                                                        | 43                | 23                 | 53.5              |
| Iwate        | 663                                                        | 58                | 32                 | 60.3              |
| Miyagi       | 1,126                                                      | 92                | 40                 | 44.0              |
| Akita        | 424                                                        | 29                | 17                 | 58.6              |
| Yamagata     | 525                                                        | 44                | 26                 | 59.1              |
| Fukushima    | 931                                                        | 60                | 25                 | 42.4              |
| Ibaraki      | 1,321                                                      | 124               | 64                 | 51.6              |
| Tochigi      | 983                                                        | 87                | 42                 | 48.3              |
| Gunma        | 915                                                        | 73                | 35                 | 47.9              |
| Saitama      | 2,492                                                      | 217               | 111                | 51.9              |
| Chiba        | 2,595                                                      | 214               | 83                 | 38.8              |
| Tokyo        | 7,749                                                      | 591               | 215                | 36.5              |
| Kanagawa     | 3,781                                                      | 317               | 104                | 32.9              |
| Niigata      | 449                                                        | 101               | 47                 | 46.5              |
| Toyama       | 1,090                                                      | 66                | 29                 | 43.9              |
| Ishikawa     | 1,238                                                      | 48                | 21                 | 43.8              |
| Fukui        | 1,707                                                      | 26                | 10                 | 38.5              |
| Yamanashi    | 3,853                                                      | 45                | 19                 | 42.2              |
| Nagano       | 843                                                        | 92                | 46                 | 50.0              |
| Gifu         | 1,052                                                      | 90                | 66                 | 74.2              |
| Shizuoka     | 510                                                        | 131               | 57                 | 43.5              |
| Aichi        | 545                                                        | 282               | 132                | 47.1              |
| Mie          | 345                                                        | 66                | 46                 | 69.7              |
| Shiga        | 557                                                        | 58                | 30                 | 51.7              |
| Kyoto        | 583                                                        | 96                | 41                 | 42.7              |
| Osaka        | 659                                                        | 445               | 220                | 49.9              |
| Hyogo        | 1,324                                                      | 255               | 99                 | 39.0              |
| Nara         | 5,523                                                      | 55                | 24                 | 43.6              |
| Wakayama     | 3,135                                                      | 43                | 25                 | 58.1              |
| Tottori      | 1,015                                                      | 28                | 11                 | 39.3              |
| Shimane      | 275                                                        | 22                | 13                 | 59.1              |
| Okayama      | 1,599                                                      | 76                | 30                 | 39.5              |
| Hiroshima    | 312                                                        | 131               | 49                 | 37.4              |
| Yamaguchi    | 738                                                        | 43                | 19                 | 44.2              |
| Tokushima    | 482                                                        | 51                | 23                 | 46.0              |
| Kagawa       | 503                                                        | 33                | 14                 | 42.4              |
| Ehime        | 741                                                        | 56                | 22                 | 39.3              |
| Kochi        | 422                                                        | 30                | 20                 | 66.7              |
| Fukuoka      | 3,023                                                      | 264               | 104                | 39.5              |
| Saga         | 400                                                        | 51                | 32                 | 64.0              |
| Nagasaki     | 772                                                        | 70                | 39                 | 55.7              |
| Kumamoto     | 624                                                        | 56                | 33                 | 58.9              |
| Oita         | 854                                                        | 36                | 21                 | 58.3              |
| Miyazaki     | 516                                                        | 56                | 24                 | 43.6              |
| Kagoshima    | 811                                                        | 81                | 45                 | 55.6              |
| Okinawa      | 441                                                        | 38                | 15                 | 39.5              |
| <b>Total</b> | <b>64,545</b>                                              | <b>5250</b>       | <b>2345</b>        | <b>44.8</b>       |
